# Improving Deconvolution Methods in Biology through Open Innovation Competitions: An Application to the Connectivity Map

Andrea Blasco (Harvard)      Ted Natoli (Broad)      Michael G. Endres (Harvard)  
Rinat A. Sergeev (Harvard)      Steven Randazzo (Harvard)      Jin H. Paik (Harvard)  
Max Macaluso (Broad)      Rajiv Narayan (Broad)      Karim R. Lakhani (Harvard)  
Aravind Subramanian (Broad)

Last updated: Jan 07, 2020

## Abstract

A recurring problem in biomedical research is how to isolate signals of distinct populations (cell types, tissues, and genes) from composite measures obtained by a single analyte or sensor. Existing computational deconvolution approaches work well in many specific settings, but they might be suboptimal in more general applications. Here, we describe new methods that were obtained via an open innovation competition. The goal of the competition was to characterize the expression of 1,000 genes from 500 composite measurements, which constitutes the approach of a new assay, called L1000, used to scale-up the Connectivity Map (CMap) — a catalog of millions of perturbational gene expression profiles. The competition used a novel dataset of 2,200 profiles and attracted 294 competitors from 20 countries. The top-nine performing methods ranged from machine learning approaches (Convolutional Neural Networks and Random Forests) to more traditional ones (Gaussian Mixtures and k-means). These solutions were faster and more accurate than the benchmark and likely have applications beyond gene expression.

Keywords: connectivity map; open innovation competition; crowdsourcing; deconvolution algorithm; machine learning; gene expression.

## 1 Introduction

Deconvolution problems are commonplace in many areas of science and engineering. In the context of biomedical research, a recurring issue is how to isolate signals of distinct populations (cell types, tissues, and genes) from composite measures obtained by a single analyte or sensor. This problem often stems from the prohibitive cost of profiling each population separately [1, 2] and has important implications for the analysis of transcriptional data in mixed samples [3, 4, 5, 6], single-cell data [7], and the study of cell dynamics [8], but it also appears in the analysis of imaging data [9].

Existing computational deconvolution approaches work well in many specific settings [10] but they might be suboptimal in more general applications. Machine learning techniques can potentially improve upon current methods. A typical advantage is the ability to capture complicated patterns that can be hard to model otherwise, especially in complex and massive datasets as those frequently used in biomedical research. However, introducing machine learning in the field presents several challenges; some of which are validation, adaptation to complex datasets, and identification of the best machine-learning approaches to specific problems.

Here we describe how we addressed these challenges in the context of the Connectivity Map (CMap). CMap is a catalog of over 1.3 million human gene-expression profiles of genetic or pharmacologic perturbation that, coupled with powerful pattern matching algorithms, enables rapid hypothesis development in multiple areas of biomedical research, including drug discovery and development [1]. To produce data of that scale, CMap has developed a novel assay called L1000. L1000 uses a 500-plex fluorescence-based flow cytometry system to measure 1,000 “landmark” genes that were selected to largely capture the cell’s transcriptional state. This reduced representation of the transcriptome enables L1000 to achieve a significant cost reduction compared to more traditional methods, such as RNA-sequencing. However, a key technical challenge is to deconvolute the 500 measurements into separate 1,000 gene expression values. The current approach, a k-means algorithm called “dpeak”, is slow and susceptible to errors. Below we report new methods, obtained via an open innovation challenge, that represent improvements to the current algorithm.

For the evaluation of these new methods, we generated a novel experimental dataset of L1000 profiles for 122 different perturbagens (shRNA and compounds) at multiple replicates for a total of over 2,200 gene expression experiments. We varied the detection mode for acquiring L1000 data between the current dual-detection procedure (DUO) that obtains a raw composite measure of two genes per analyte color, and a more expensive uni-detection procedure (UNI) that measures one gene per analyte color. The deconvolution algorithm processes the DUO data and assigns the correct expression level to each of the two genes measured by the same analyte type. This procedure is not needed with the UNI data. Hence, the UNI data served as “ground truth” that enabled us to evaluate the accuracy of different deconvolution methods applied to the DUO data.

Leveraging this data set, we then explored different deconvolution approaches through an open innovation competition [11, 12]. We ran the contest on Topcoder (Wipro, India), a popular crowdsourcing platform. The contest challenged participants to use the novel dataset to improve the L1000 deconvolution algorithm. The contest drew about 300 competitors from 20 different countries and resulted in a diversity of approaches. The top approaches included machine-learning methods, such as Random Forests and Convolutional Neural Networks (CNNs), as well as more traditional models such as Gaussian mixtures and k-means. These approaches performed significantly better than the L1000 benchmark in various measures of accuracy and computational speed, and likely have application beyond gene expression.

## 2 Methods

We provided competitors with a problem statement, access to training and testing data, and a well-defined scoring function. Figure 1 shows a schematic illustration of these three elements.

The problem statement described L1000’s deconvolution task and the current solution. The key insight was that the distribution of the composite expression measurements of two genes should have two peaks and the size of each peak should reflect the proportion of measurements for the corresponding gene. L1000 takes full advantage of this fact by pairing genes optimally, trying to maximize the average difference in their expression levels, and by mixing genes in a 2:1 proportion to enable the assignment of the correct expression levels to each gene within each pair [see 1, for the details]. A deconvolution algorithm is then used to detect the peaks within the composite distribution. The current dpeak solution is based on a k-means clustering algorithm that partitions the composite measurements for each profile into  $k$  clusters by minimizing the within-cluster sum of squares. It then associates the largest cluster to the gene with higher bead proportion, and the smallest cluster to the gene with lower bead proportion, assigning their median values to the corresponding gene.

The training and testing datasets are publicly available (S1 Data). These data consisted of six 384-well perturbagen plates, each containing mutually exclusive sets of compound and short-hairpin (shRNA) treatments (S1 Table and S2 Table show a complete list of the perturbagens). Multiple cell lines and perturbagen were used to avoid potentially over-fitting problems. The compound and shRNA perturbagen plates were arbitrarily grouped into pairs, and to avoid any potential ‘information leakage’ each pair was profiled in a different cell line. The resulting lysates were amplified by Ligation Mediated Amplification (LMA, Subramanian et al. [1]). The amplicon was then split and detected in both UNI and DUO detection modes, resulting in three pairs of data generated under comparable circumstances. The training data was available for all the contestants to develop and validate their solutions offline. The testing data was used for submission evaluation during the contest and to populate a live leaderboard. The holdout data was used for final evaluation, thus guarding

against over-fitting. Prizes were awarded based on performance on the holdout dataset.

The scoring function combined measures of accuracy and computational speed (S1 Appendix). The accuracy metric was the product of two different metrics. The first was the average genewise Spearman's rank correlation between the deconvoluted expression values and the ground truth. The second was the Area Under the receiver operating characteristic Curve (AUC) in the prediction of extremely modulated genes. Speed was measured by executing each submission on comparable multi-core machines, thus allowing competitors to employ multithreading techniques, and the corresponding score was the average runtime in units of the benchmark runtime.

The contest lasted 21 days. A prize purse of \$23,000 in cash was offered to competitors as an incentive to be divided among the top 9 submissions.

### 3 Results

The contest attracted 294 participants who made 820 submissions using a variety of different methods (S1 Table). We report the top four methods based on the holdout data.

The winning solution (by a competitor from the United States with a degree in Physics from the University of Kansas) used a random forest algorithm. The algorithm combines predictions from 10 different trees trained on 60 derived data features. These features include a combination of low-peak and high-peak estimates for each gene pair and aggregate measures that are sensitive to systematic bias at the perturbagen, analyte, and plate level.

The second solution (by a competitor from Poland with a Master's degree in Computer Science from Lodz University of Technology) used the Expectation-Maximization (EM) algorithm to fit a mixture of two log-normal models to the data for each gene pair. This algorithm does not assume any a priori probability (the 2:1 ratio) of assignment to clusters, but learns it from the data by fitting a plate-wide distribution of cluster sizes.

The third solution (by a competitor from India with a bachelor's degree in Computer Science) uses a fast k-means algorithm with a random initialization procedure that tends to avoid local minima and is more robust to extreme outliers.

The fourth solution (by a competitor from Ukraine with a bachelor's degree in Computer Science from the Cherkasy National University) used a Convolutional Neural Network (CNN). This algorithm first filters and transforms the data into a 32-bin histogram for each pair of genes. Then, it uses the U-net architecture [13], comprising a contracting path to capture context and a symmetric expanding path, to provide adequate representation of the data. The output of this network is then used to assign each of the 32 bins to one of the two genes for each pair, and to predict the exact value within the bin. This second step uses two subnetworks with the same architecture and a mean squared error loss function.

#### 3.1 Clustering by method and perturbagen type

We evaluated the top-nine performing methods on the accuracy of their predictions, as well as their speed. Using the holdout dataset, we generated the contestants' deconvolution data (DECONV) and the corresponding

differential expression (DE) values [as in 1]. We then compared the results using a two-dimensional t-SNE projection, run once on each of the entire DECONV and DE datasets [14].

The DECONV data clustered well by pertubagen type and less by algorithm type (Figure 2, A and B), although with some notable commonalities in the predictions generated by similar approaches (Figure 2, C). For example, the decision tree regressor (DTR) algorithms have similar ‘footprints’ in the projection, as do the k-means and Gaussian mixture model (GMM) algorithms. After the transformation to DE data, however, the t-SNE projection was more homogenous, with no particular clustering by pertubagen and algorithm type (Figure 2 D), which was reassuring given standard CMap analysis is performed on DE values.

### 3.2 Correlation accuracy

To evaluate the deconvolution accuracy, we used the genewise Spearman rank correlation ( $\rho$ ) between the UNI data and the values obtained by the competitors through the deconvolution of DUO data. We did so for the shRNA and compound pertubagens separately, comparing the results between the subsets of 488 genes in high and low bead proportion.

The winner’s cumulative distribution of  $\rho$ ’s was significantly shifted towards higher values compared to the benchmark’s ( $p < 0.001$ ; Figure 3, a and b) with an average improvement that was twice as large with genes in low bead proportion compared to those in high bead proportion (5 and 2 percentage points, respectively).

The other competitors showed similar improvements on average (Figure 3, c and d), although the average improvement was generally smaller compared to the winning method and, for the genes in low bead proportion, insignificantly different from the benchmark (Figure 3, c and d).

To evaluate the extent to which the winning algorithm outperformed the others, we ranked the top-nine algorithms by the average correlation metric for each gene (1 = highest, 9 = lowest). We then computed the percentage of genes for which a given algorithm was ranked first. The winner was ranked first for 30% of the genes, followed at some distance by the second-placed gaussian-mixture method (20%), and by the CNN method (13%). Thus, the top two submissions combined outperformed the rest for about half of the genes. Even so, all but a few algorithms were the best performers for at least 5% of the genes, suggesting some complementarity between these algorithms.

### 3.3 Detection of extreme modulations

To evaluate the accuracy at the DE level, we used the detection accuracy of extreme modulations (genes notably up- or down-regulated by perturbation). We used the UNI data with DE values above a threshold as the ground truth; and we evaluated the detection accuracy of each solution by computing the corresponding AUC for each pertubagen type. The detection accuracy of extreme modulations was generally high for both shRNA and compound samples (AUC > 0.87 and AUC > 0.91, respectively), with the competitors achieving notable improvements over the benchmark (Figure 4, a). Compared to the benchmark, the winning solution detects about 4 thousand less extreme modulations (40.8 and 44.2 thousand, respectively), thus being more conservative. However, when we restricted the comparison to extreme modulations detected by UNI as well (thus controlling for detection precision), the winning solution detects about 1.5 thousand more extreme

modulations than the benchmark (27.1 and 25.6 thousand, respectively), representing a sensible 6% increase in “true” detections.<sup>1</sup>

We complemented the above analysis by using targeted gene knockdown (KD) experiments as the ground truth for a subset of data. These are experiments in which a landmark gene was targeted by an shRNA, and hence we expect to observe a significant decrease in expression for the targeted gene. We evaluated the KD detection accuracy of each solution by computing the corresponding percentage of successful KD genes identified or recalled by the algorithm (defining a successful KD as one gene in which the DE value and the corresponding gene-wise rank in the experiment are less than a given threshold, -2 and 10 respectively). We computed the percentage recall for the UNI data as well, which yielded an estimate of the maximum achievable recall of 0.80. Relative to this level, nearly all algorithms achieved a good recall and precision, with values that were higher than the benchmark solution for all but two methods (Figure 4, b).

### 3.4 Reduced variation across replicate samples

To evaluate the reproducibility of the results, we leveraged the several replicate samples for each shRNA and compound experiment in our dataset (about 4 and 10 replicates, respectively). We computed the mean gene-wise coefficient of variation (CV) for each method, which is a measure of inter-replicate variability computed as the average ratio between the interquartile range and the median value across all the replicates. Using this measure, we found all solutions achieved significant improvements over the benchmark (Figure 5); and the winning method, which was the most accurate on average, also achieved the lowest inter-replicate variation overall.

### 3.5 Computational speed

The speed improvements over the benchmark were substantial. While dpeak took about 4-5 minutes per plate, the fastest algorithm took as little as 5 seconds per plate (more than a 60x speedup compared to the benchmark) and the slowest was well below one minute. These speed improvements are not directly attributable to the use of multiple cores, since both the benchmark and contestant algorithms leverage multi-core techniques. We observed no particular trade-off between speed and accuracy.

### 3.6 Ensembles

Lastly, we assessed the performance of ensembles combining the predictions of different computational methods by taking the median value across all 10 predictions (including the benchmark). By focusing on the subset of the data with shRNA experiments (ignoring the data with compound experiments), the performance in both Spearman correlation and the AUC metrics of the ensemble tended to increase with the number of models involved (Figure 6). However, the maximum performance in both metrics tended to plateau (or even decrease) after combining the results of 3 or more models. This result suggested limited gains from having ensembles, although it may be worth exploring more sophisticated aggregation approaches.

---

<sup>1</sup>These results are for the dataset with shRNA experiments. We expect similar results for the dataset of compound experiments.

## 4 Discussion

We created a novel dataset of L1000 profiles for over 120 shRNA and compound experiments with several replicates for a total of 2,200 gene expression profiles of genes measured independently, and in tandem. This dataset constitutes now a public resource (S1 Data) to all the researchers in this area who are interested in testing their deconvolution approaches.

Using an open innovation competition, we collected and evaluated multiple and diverse deconvolution methods. The best approach was based on a random forest, which is a collection of decision tree regressors. This method achieved: (i) the highest global correlation between the ground-truth and the corresponding deconvoluted data, (ii) the lowest inter-replicate variation, and (iii), compared to the benchmark, was able to detect more than a thousand additional extremely modulated genes, while reducing the false positives at the same time. Our analysis further showed that these gains are considerable when the gene populations were sampled in different proportions (here, genes in high and low bead proportions), with the k-means benchmark approach being systematically less accurate because it does little to mitigate the discrepancy in variability between the genes measured with high and low bead proportion.

In addition, the random-forest approach achieved these improvements with only 10 trees on 60 features. Thus, the algorithm is also relatively fast and easy to implement. By comparison, the fastest approach used a more traditional Gaussian mixture model (with plate-level adjustments), which turned out to be less accurate. Hence, and overall, our analysis provided evidence of the tremendous potential of using random-forest methods for deconvolution problems in biology.

## 5 Tables and Figures



**Figure 1**

**Schematic illustrating the computational problem, generated data, and scoring function.** Panel (a) provides a schematic description of the L1000 DUO detection mode and the associated deconvolution problem to be addressed by the contestants. Panel (b) shows the data generated for the contest comprising 6 different sets of perturbational experiments with 3 plates of compound (CP) and shRNA treatments (KD) each. Each plate was detected using DUO (2 genes per analyte) and UNI (one gene per analyte) with UNI serving as the ground truth. Contestants were given two plates of data for training their models offline; a second set of two plates was used during the contest for testing and to populate the live leaderboard; and the third set of two was used as holdout to determine the final contestant placements. Panel (c) illustrates the accuracy component of the scoring function that was used to evaluate the solutions submitted by the competitors. A solution's overall accuracy score was the product of the genewise Spearman rank correlations with ground truth (DECONV data) and the AUC of extreme modulations (DE data).

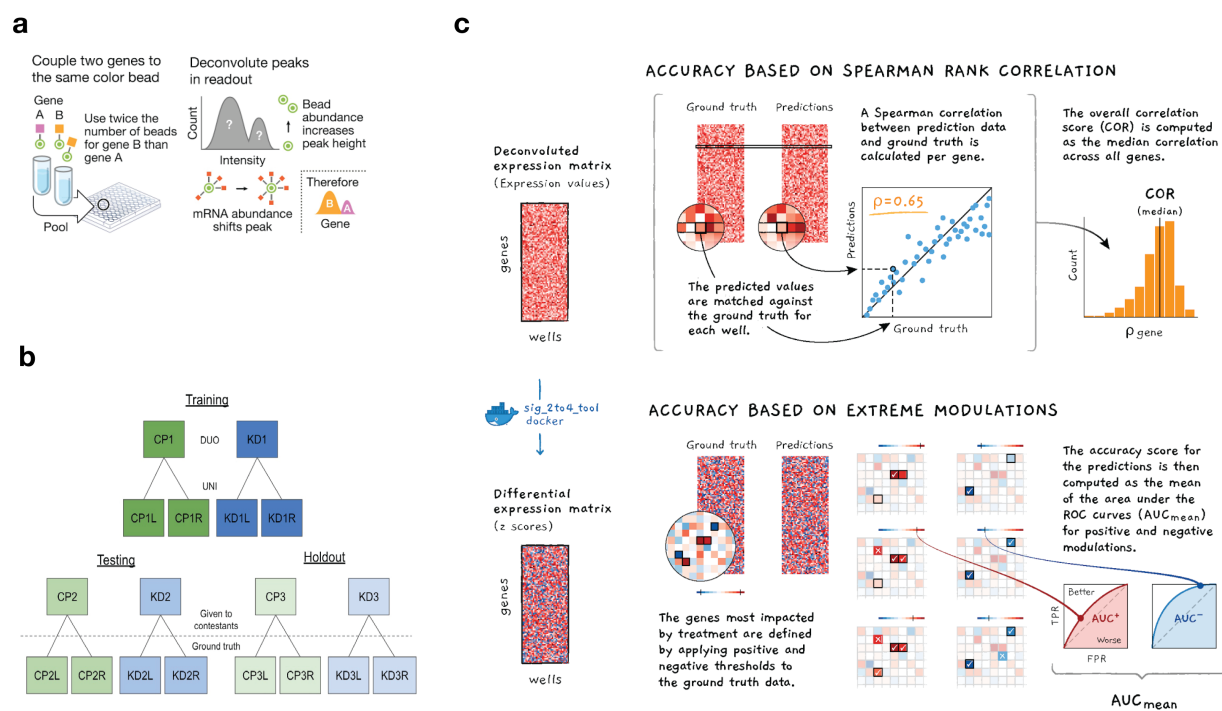

## Figure 2

**Clustering of solutions.** Each point represents the two-dimensional t-SNE projection of a sample generated by UNI ground truth (GT) or by applying a deconvolution algorithm to DUO data. t-SNE was run on the 2 plates of holdout data, one each containing compound and shRNA treatments. t-SNE was run once on all DECONV data and once on all DE data. The resulting projections were colored and subset to generate the following panels: DECONV data colored by perturbation type (**a**) and algorithm type (**b**). DECONV (**c**) and DE (**d**) data colored by algorithm type and stratified by each individual implementation.

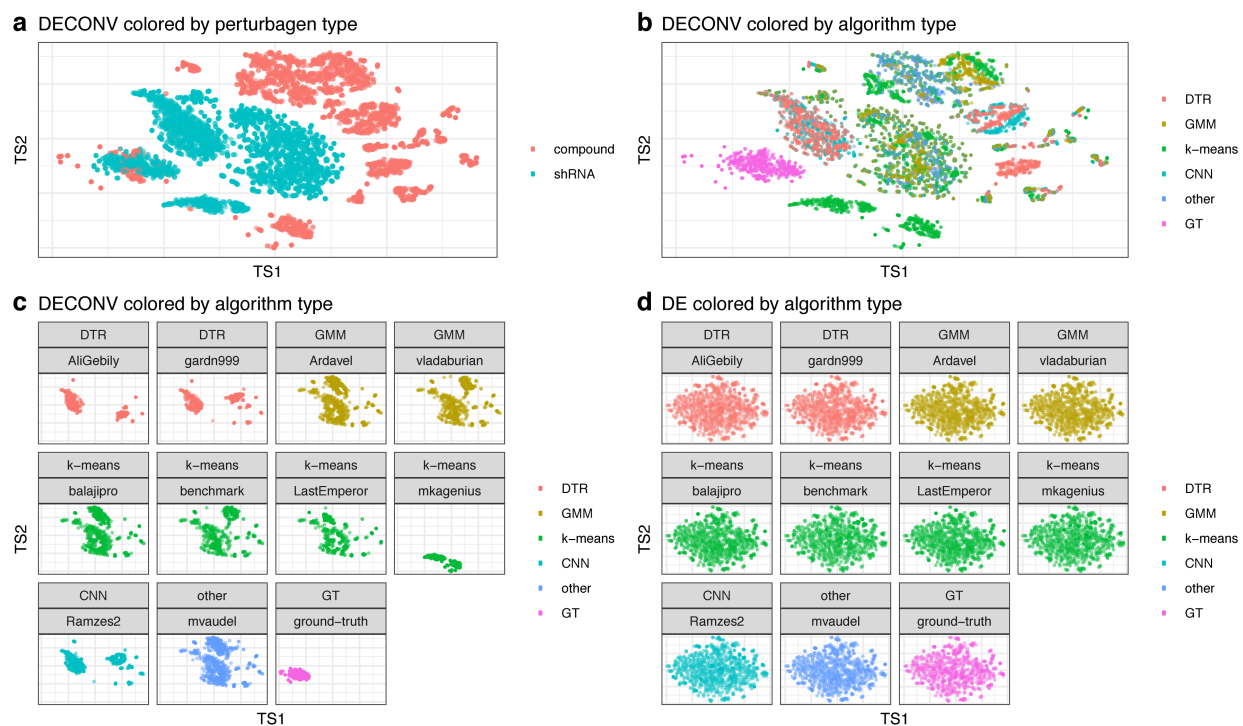

### Figure 3

**Correlation between ground-truth and deconvolution samples.** This figure shows the cumulative distribution of the genewise Spearman correlation coefficients between the ground-truth (UNI) and the deconvolution data (DUO) achieved by the winning random-forest method against the k-means benchmark (dpeak\*) for the subset of genes in low bead proportion (**a**) and in high bead proportion (**b**) for the shRNA and compound perturbagen types. It also shows the mean (across genes) correlation and 95% CI for the top-nine performing solutions and the benchmark for the compound data of genes in low bead proportion (**c**) and those in high bead proportions (**d**), as well as the shRNA data of genes in low bead proportion (**e**) and those in high bead proportion (**f**). Asterisks indicate statistical significance at \*\*\* 0.001, \*\* 0.05, and \* 0.1 level of a Wilcoxon-rank-sum test of location difference between the competitor's distribution and the corresponding distribution of the benchmark.

**a**

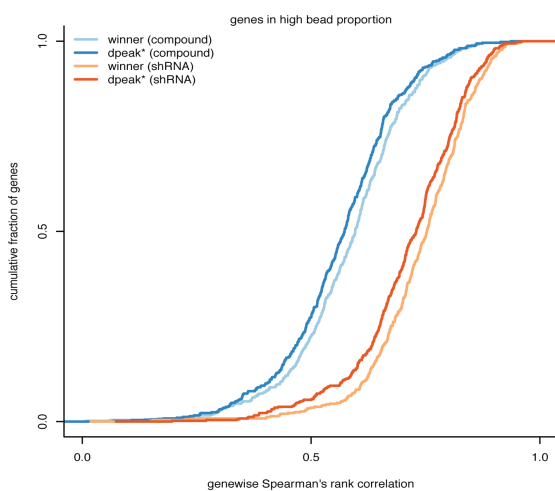

**b**

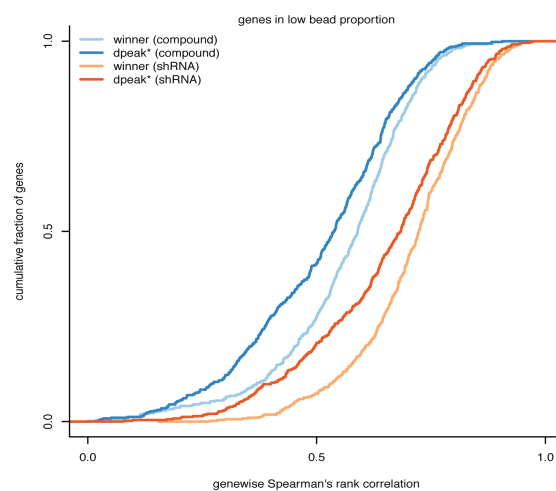

**c**

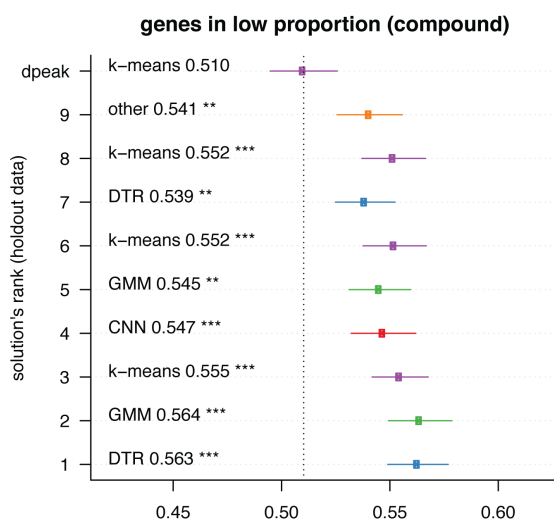

**d**

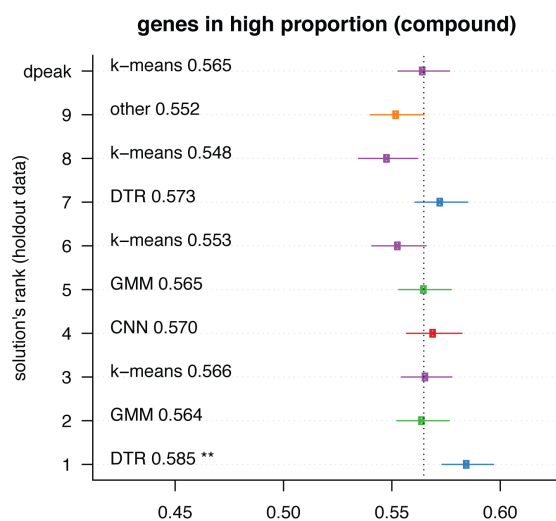

**e**

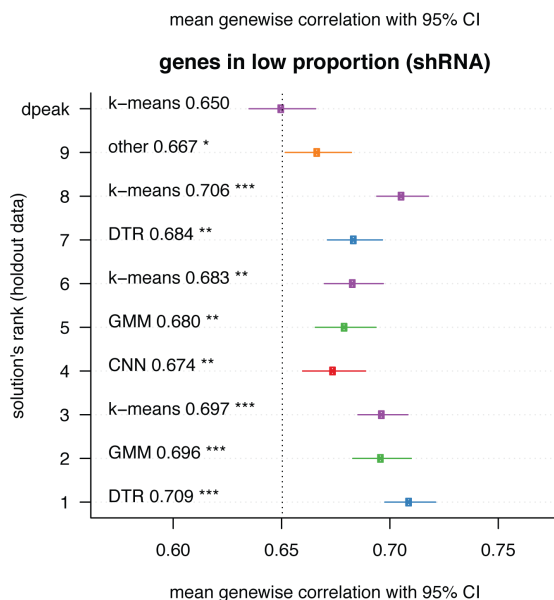

**f**

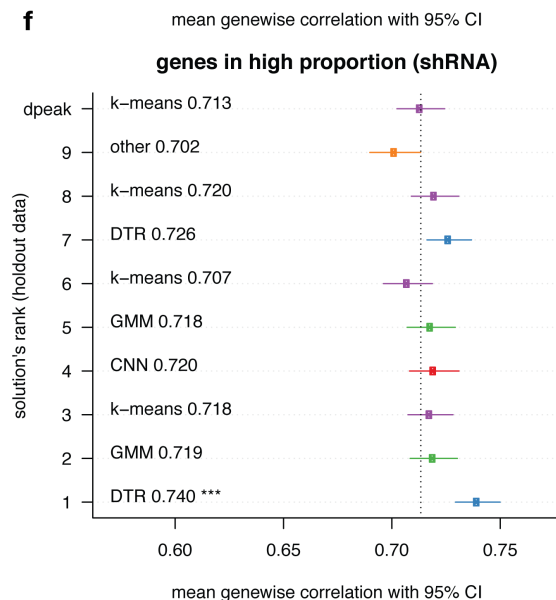

## Figure 4

**Detection of extreme modulations and targeted knockdown genes.** This figure shows the AUC for the predicted differential expressions (DE data) obtained by the top-nine performing methods and the k-means benchmark (dpeak) and the corresponding ground-truth extreme modulations (as detected in the UNI data) both for the shRNA and compound samples (a). It also shows the computed recall and precision of the top-nine methods and the benchmark for the detection of the targeted knockdown genes for a subset of shRNA experiments (b).

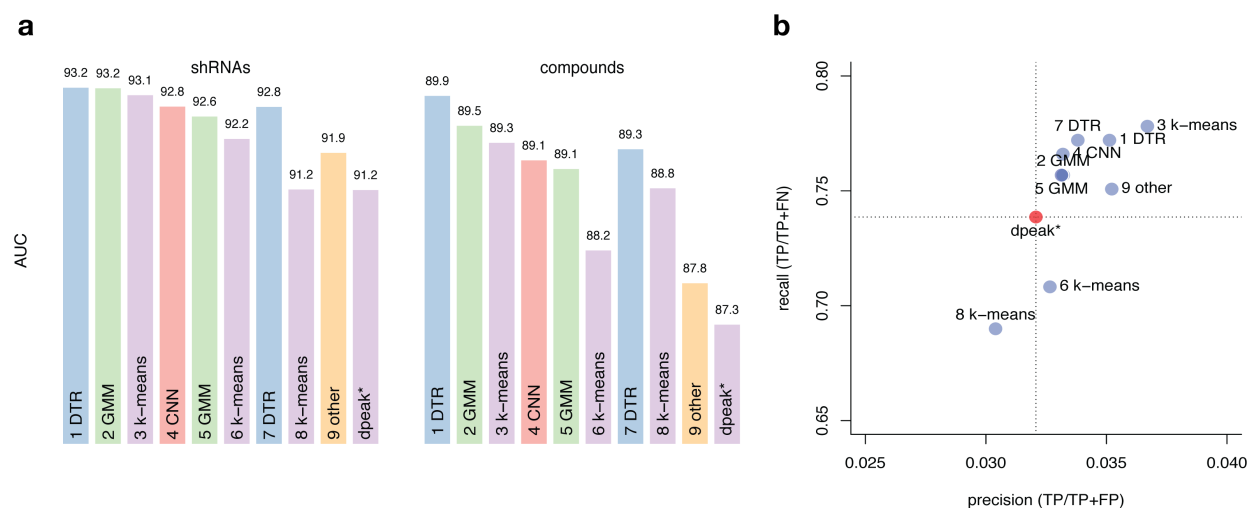

**Figure 5**

**Variation across replicates for the top-four performing methods and the (dpeak) benchmark.**

This figure shows the mean coefficient of variation for each compound perturbation in our sample. The mean coefficient of variation is computed as the average of the gene-wise percent ratio between the interquartile-range and the median of the deconvoluted values across 10 replicates. These values are computed separately for the subset of genes in low bead proportions (**a**) and of those in high bead proportions (**b**). The perturbagens on the x-axis are ordered by increasing mean coefficient of variation of the benchmark. This was computed for all the genes, allowing a direct comparison across the panels.

**a**

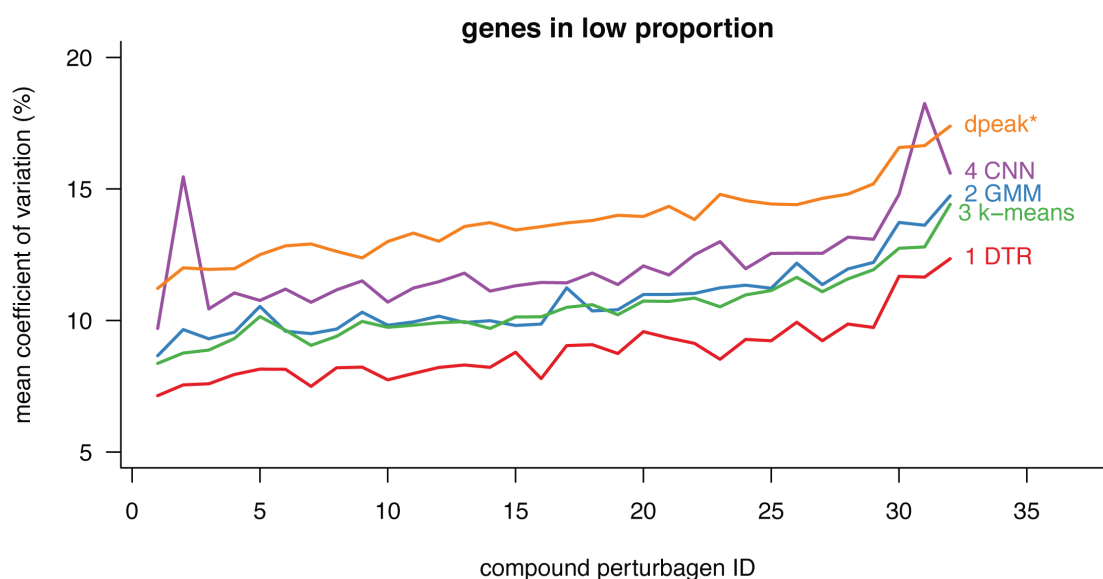

**b**

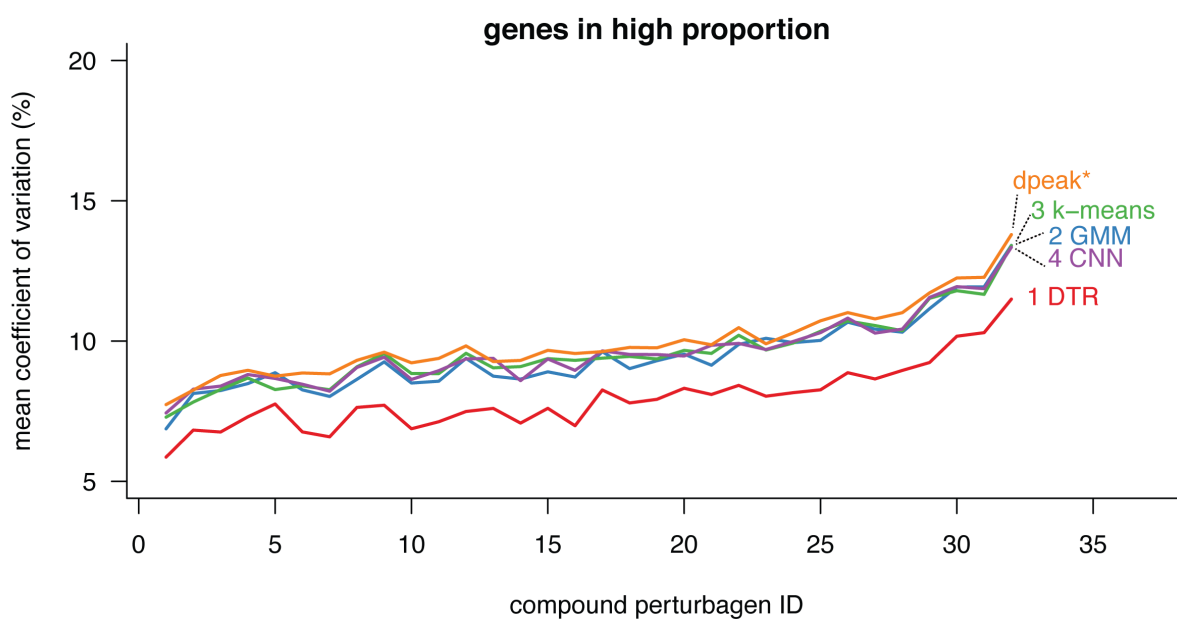

## Figure 6

**Performance of ensembles.** This figure shows the performance in the (a) correlation metric and (b) AUC metric of the ensemble based on the median prediction of all possible combinations of a given size of the top 9 algorithms plus the benchmark. The median performance of the ensemble tends to increase with its size. However, the maximum performance in both metrics tends to plateau (or even decrease) after the ensemble reaches a size equal to 3.

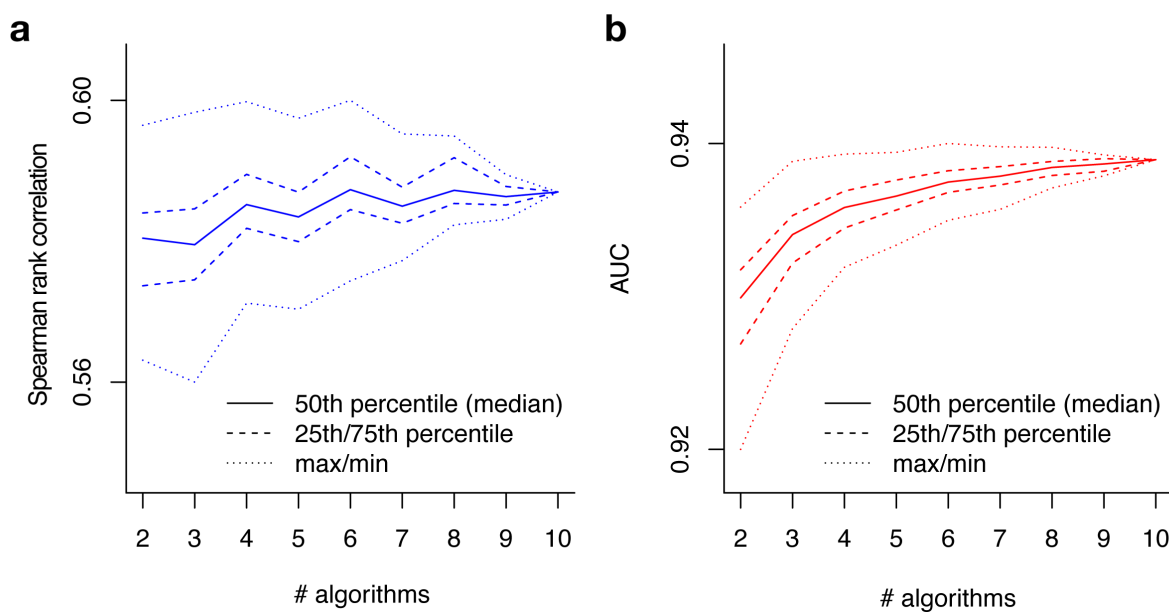

## Supporting information



## S1 Table

**Top-nine performing solutions.** This table lists the top-nine solutions and the languages and algorithms each used, as well as the average speedup per plate relative to the k-means benchmark.

| rank | handle      | language   | method                  | category | speedup |
|------|-------------|------------|-------------------------|----------|---------|
| 1    | gardn999    | Java       | random forest regressor | DTR      | 17x     |
| 2    | Ardavel     | C++        | Gaussian mixture model  | GMM      | 62x     |
| 3    | mkagenius   | C++        | modified k-means        | k-means  | 24x     |
| 4    | Ramzes2     | Python/C++ | ConvNet                 | CNN      | 10x     |
| 5    | vladaburian | Python/C++ | Gaussian mixture model  | GMM      | 7x      |
| 6    | balajipro   | Python/C++ | modified k-means        | k-means  | 21x     |
| 7    | AliGebily   | Python     | boosted tree regressor  | DTR      | 5x      |
| 8    | LastEmperor | Python     | modified k-means        | k-means  | 7x      |
| 9    | mvaudel     | Java       | other                   | other    | 55x     |

## S2 Table

**Compound perturbagens descriptives.** This table shows compound perturbagen names (`pert_iname`), unique id (`pert_id`), time of treatment (`pert_itime`), dose (`pert_idose`), and number of replicates (`num_replicates`).

| <code>pert_iname</code>                | <code>pert_id</code> | <code>pert_itime</code> | <code>pert_idose</code> | <code>num_replicates</code> |
|----------------------------------------|----------------------|-------------------------|-------------------------|-----------------------------|
| abiraterone(cb-7598)                   | BRD-K50071428        | 24 h                    | 10 um                   | 11                          |
| acalabrutinib                          | BRD-K64034691        | 24 h                    | 10 um                   | 11                          |
| afatinib                               | BRD-K66175015        | 24 h                    | 10 um                   | 11                          |
| artesanate                             | BRD-K54634444        | 24 h                    | 10 um                   | 11                          |
| azithromycin                           | BRD-K74501079        | 24 h                    | 10 um                   | 11                          |
| betamethasone dipropionate (diprolene) | BRD-K58148589        | 24 h                    | 10 um                   | 11                          |
| CGS-21680                              | BRD-A81866333        | 24 h                    | 10 um                   | 11                          |
| chelidonine                            | BRD-K32828673        | 24 h                    | 10 um                   | 11                          |
| clobetasol                             | BRD-K84443303        | 24 h                    | 10 um                   | 11                          |
| digoxin                                | BRD-A91712064        | 24 h                    | 10 um                   | 11                          |
| disulfiram                             | BRD-K32744045        | 24 h                    | 10 um                   | 10                          |
| emetine hcl                            | BRD-A77414132        | 24 h                    | 10 um                   | 10                          |
| eplerenone                             | BRD-K19761926        | 24 h                    | 10 um                   | 11                          |
| epothilone-a                           | BRD-K71823332        | 24 h                    | 10 um                   | 9                           |
| flumetasone                            | BRD-K61496577        | 24 h                    | 10 um                   | 11                          |
| fluocinolone                           | BRD-K94353609        | 24 h                    | 10 um                   | 11                          |
| genipin                                | BRD-K28824103        | 24 h                    | 10 um                   | 11                          |
| hydrocortisone                         | BRD-K93568044        | 24 h                    | 10 um                   | 10                          |
| hyoscyamine                            | BRD-K40530731        | 24 h                    | 10 um                   | 11                          |
| indirubin                              | BRD-K17894950        | 24 h                    | 10 um                   | 10                          |
| L-745870                               | BRD-K05528470        | 24 h                    | 10 um                   | 10                          |
| nTZDpa                                 | BRD-K54708045        | 24 h                    | 10 um                   | 11                          |
| oligomycin-a                           | BRD-A81541225        | 24 h                    | 10 um                   | 11                          |
| PRIMA1                                 | BRD-K15318909        | 24 h                    | 10 um                   | 11                          |
| RITA                                   | BRD-K00317371        | 24 h                    | 10 um                   | 11                          |
| spironolactone                         | BRD-K90027355        | 24 h                    | 10 um                   | 11                          |
| tanespimycin                           | BRD-K81473043        | 24 h                    | 10 um                   | 11                          |
| tretinoin                              | BRD-K71879491        | 24 h                    | 10 um                   | 10                          |
| UB-165                                 | BRD-A14574269        | 24 h                    | 10 um                   | 11                          |
| ursolic-acid                           | BRD-K68185022        | 24 h                    | 10 um                   | 11                          |

| pert_iname | pert_id       | pert_itime | pert_idose | num_replicates |
|------------|---------------|------------|------------|----------------|
| WAY-161503 | BRD-A62021152 | 24 h       | 10 um      | 11             |
| ZM-39923   | BRD-K40624912 | 24 h       | 10 um      | 11             |

### S3 Table

**Short-hairpin (shRNA) perturbagens descriptives.** This table shows shRNA perturbagen names (`pert_iname`), unique id (`pert_id`), and number of replicates (`num_replicates`).

| <code>pert_iname</code> | <code>pert_id</code> | <code>num_replicates</code> |
|-------------------------|----------------------|-----------------------------|
| ABCB6                   | TRCN0000060320       | 4                           |
| ADI1                    | TRCN0000052275       | 4                           |
| ALDOA                   | TRCN0000052504       | 4                           |
| ANXA7                   | TRCN0000056304       | 4                           |
| ARHGAP1                 | TRCN0000307776       | 4                           |
| ASAH1                   | TRCN0000029402       | 4                           |
| ATMIN                   | TRCN0000141397       | 4                           |
| ATP2C1                  | TRCN0000043279       | 4                           |
| B3GNT1                  | TRCN0000035909       | 4                           |
| BAX                     | TRCN0000033471       | 4                           |
| BIRC5                   | TRCN0000073718       | 4                           |
| BLCAP                   | TRCN0000161355       | 4                           |
| BLVRA                   | TRCN0000046391       | 4                           |
| BNIP3L                  | TRCN0000007847       | 4                           |
| CALU                    | TRCN0000053792       | 4                           |
| CCDC85B                 | TRCN0000242754       | 4                           |
| CCND1                   | TRCN0000040038       | 4                           |
| CD97                    | TRCN0000008234       | 4                           |
| CHMP4A                  | TRCN0000150154       | 4                           |
| CNOT4                   | TRCN0000015216       | 4                           |
| DDR1                    | TRCN0000000618       | 4                           |
| DDX10                   | TRCN0000218747       | 4                           |
| DECR1                   | TRCN0000046516       | 4                           |
| DNM1L                   | TRCN0000001097       | 3                           |
| ECH1                    | TRCN0000052455       | 4                           |
| EIF4EBP1                | TRCN0000040206       | 4                           |
| EMPTY_VECTOR            | TRCN0000208001       | 15                          |
| ETFB                    | TRCN0000064432       | 4                           |
| FDFT1                   | TRCN0000036327       | 4                           |
| GALE                    | TRCN0000049461       | 4                           |
| GFP                     | TRCN0000072181       | 16                          |

| pert_iname | pert_id        | num_replicates |
|------------|----------------|----------------|
| GRN        | TRCN0000115978 | 4              |
| GTPBP8     | TRCN0000343727 | 4              |
| HDGFRP3    | TRCN0000107348 | 4              |
| HIST1H2BK  | TRCN0000106710 | 4              |
| IKBKAP     | TRCN0000037871 | 4              |
| INPP4B     | TRCN0000230838 | 4              |
| INSIG1     | TRCN0000134159 | 4              |
| ITFG1      | TRCN0000343702 | 3              |
| JMJD6      | TRCN0000063340 | 4              |
| LBR        | TRCN0000060460 | 4              |
| LGMN       | TRCN0000029255 | 4              |
| LPGAT1     | TRCN0000116066 | 4              |
| LSM6       | TRCN0000074719 | 4              |
| MAPKAPK2   | TRCN0000002285 | 4              |
| MAPKAPK3   | TRCN0000006154 | 4              |
| MAPKAPK5   | TRCN0000000684 | 4              |
| MIF        | TRCN0000056818 | 4              |
| MRPL12     | TRCN0000072655 | 4              |
| NT5DC2     | TRCN0000350758 | 4              |
| NUP88      | TRCN0000145079 | 4              |
| PARP2      | TRCN0000007933 | 4              |
| PLCB3      | TRCN0000000431 | 4              |
| POLE2      | TRCN0000233181 | 4              |
| PPIE       | TRCN0000049371 | 4              |
| PRKAG2     | TRCN0000003146 | 4              |
| PSMB10     | TRCN0000010833 | 4              |
| PTPN6      | TRCN0000011052 | 4              |
| RAB11FIP2  | TRCN0000322640 | 4              |
| RALB       | TRCN0000072956 | 4              |
| RHEB       | TRCN0000010425 | 3              |
| RNF167     | TRCN0000004100 | 4              |
| RPN1       | TRCN0000072588 | 4              |
| SLC25A4    | TRCN0000044967 | 4              |
| SNX11      | TRCN0000127684 | 4              |

---

| pert_iname     | pert_id        | num_replicates |
|----------------|----------------|----------------|
| STK25          | TRCN0000006270 | 4              |
| STUB1          | TRCN0000007525 | 4              |
| STXBP1         | TRCN0000147480 | 4              |
| SYPL1          | TRCN0000059926 | 4              |
| TATDN2         | TRCN0000049828 | 4              |
| TM9SF3         | TRCN0000059371 | 4              |
| TMEM110        | TRCN0000127960 | 4              |
| TMEM50A        | TRCN0000129223 | 4              |
| trcn0000014632 | TRCN0000014632 | 4              |
| trcn0000040123 | TRCN0000040123 | 4              |
| trcn0000220641 | TRCN0000220641 | 4              |
| trcn0000221408 | TRCN0000221408 | 4              |
| trcn0000221644 | TRCN0000221644 | 4              |
| TSKU           | TRCN0000005222 | 4              |
| UGDH           | TRCN0000028108 | 4              |
| USP14          | TRCN0000007428 | 4              |
| USP6NL         | TRCN0000253832 | 4              |
| VAT1           | TRCN0000038193 | 4              |
| VDAC1          | TRCN0000029126 | 4              |
| WIPF2          | TRCN0000029833 | 4              |
| YME1L1         | TRCN0000073864 | 4              |
| ZW10           | TRCN0000155335 | 4              |

---

## **S1 Data**

LINK TO DATA REPOSITORY on <http://CLUE.io> WILL BECOME AVAILABLE AFTER PUBLICATION

## S1 Appendix

**Scoring function.** This appendix describes the scoring function used in the contest to evaluate the performance of the competitors' submissions.

Submissions were scored based on a scoring function that combines measures of accuracy and computational speed. Accuracy measures were obtained by comparing the contestant's predictions, which were derived from *DUO* data, to the equivalent *UNI* ground truth data generated from the same samples.

The scoring function combines two measures of accuracy: correlation and AUC, which are applied to deconvoluted (*DECONV*) data and one to differential expression (*DE*) data, respectively.

*DE* is derived from *DECONV* by applying a series of transformations (parametric scaling, quantile normalization, and robust z-scoring) that are described in detail in Subramanian et al. [1]. The motivation for scoring *DE* data in addition to *DECONV* is because it is at this level where the most biologically interesting gene expression changes are observed. Of particular interest is obtaining significant improvement in the detection of, so called, "extreme modulations." These are genes that notably up- or down-regulated by perturbation and hence exhibit an exceedingly high (or low) *DE* values relative to a fixed threshold.

The first accuracy component is based on the Spearman rank correlation between the predicted *DECONV* data and the corresponding *UNI* ground truth data.

For a given dataset  $p$ , let  $M_{DUO,p}$  and  $M_{UNI,p}$  denote the matrices of the estimated gene intensities for  $G = 976$  genes (rows) and  $S = 384$  experiments (columns) under DUO and UNI detection. Compute the Spearman rank correlation matrix,  $\rho$ , between the rows of these matrices and take the median of the diagonal elements of the resulting matrix (i.e., the values corresponding to the matched experiments between UNI and DUO) to compute the median correlation per dataset,

$$\text{COR}_p = \text{median}(\text{diag}(\rho(M_{DUO,p}, M_{UNI,p}))).$$

The second component of the scoring function is based on the Area Under the receiver operating characteristic Curve (AUC) that uses the competitor's DE values at various thresholds to predict the UNI's DE values being higher than 2 ("high") or lower than -2 ("low").

For a given dataset  $p$ , let  $\text{AUC}_{p,c}$  denote the corresponding area under the curve where  $c = \{\text{high}, \text{low}\}$ ; then, compute the arithmetic mean of the area under the curve per class to obtain the corresponding score per dataset:

$$\text{AUC}_p = (\text{AUC}_{p,\text{high}} + \text{AUC}_{p,\text{low}})/2.$$

These accuracy components were integrated into a single aggregate scores:

$$\text{SCORE} = \text{SCORE}_{\text{max}} \cdot (\max(\text{COR}_p, 0))^2 \cdot \text{AUC}_p \cdot \exp(-T_{\text{solution}}/(3 \cdot T_{\text{benchmark}})),$$

where  $T_{\text{solution}}$  is the run time for deconvoluting the data in each plate, and  $T_{\text{benchmark}}$  is the deconvolution time required by the benchmark dpeak implementation.



## S2 Appendix

**L1000 Experimental Scheme** The L1000 assay uses Luminex bead-based fluorescent scanners to detect gene expression changes resulting from treating cultured human cells with chemical or genetic perturbations [Subramanian 2017]. Experiments are performed in 384-well plate format, where each well contains an independent sample. The Luminex scanner is able to distinguish between 500 different bead types, or colors, which CMap uses to measure the expression levels of 978 landmark genes using two detection approaches.

In the first detection mode, called *UNI*, each of the 978 landmark genes is measured individually on one of the 500 Luminex bead colors. In order to capture all 978 genes, two detection plates are used, each measuring 489 landmarks. The two detection plates' worth of data are then computationally combined to reconstruct the full 978-gene expression profile for each sample.

By contrast, in the *DUO* detection scheme two genes are measured using the same bead color. Each bead color produces an intensity histogram which characterizes the expression of the two distinct genes. In the ideal case, each histogram consists of two peaks each corresponding to a single gene. The genes are mixed in 2:1 ratio, thus the areas under the peaks have 2:1 ratio (see Figure 1), which enables the association of each peak with the specific gene. The practical advantage of the *DUO* detection mode is that it uses half of the laboratory reagents as *UNI* mode, and hence *DUO* is and has been the main detection mode used by CMap. After *DUO* detection, the expression values of the two genes are computationally extracted in a process called 'peak deconvolution,' described in the next section.

## References

- [1] Aravind Subramanian et al. "A next generation connectivity map: L1000 platform and the first 1,000,000 profiles". In: *Cell* 171.6 (2017), pp. 1437–1452.
- [2] Brian Cleary et al. "Efficient generation of transcriptomic profiles by random composite measurements". In: *Cell* 171.6 (2017), pp. 1424–1436.
- [3] Shai S Shen-Orr et al. "Cell type-specific gene expression differences in complex tissues". In: *Nature methods* 7.4 (2010), p. 287.
- [4] Yi Zhong and Zhandong Liu. "Gene expression deconvolution in linear space". In: *Nature methods* 9.1 (2012), p. 8.
- [5] Aaron M Newman et al. "Robust enumeration of cell subsets from tissue expression profiles". In: *Nature methods* 12.5 (2015), p. 453.
- [6] Konstantin Zaitsev et al. "Complete deconvolution of cellular mixtures based on linearity of transcriptional signatures". In: *Nature communications* 10.1 (2019), p. 2209.
- [7] Yue Deng et al. "Scalable analysis of cell-type composition from single-cell transcriptomics using deep recurrent learning". In: *Nature methods* 16.4 (2019), p. 311.
- [8] Peng Lu, Aleksey Nakorchevskiy, and Edward M Marcotte. "Expression deconvolution: a reinterpretation of DNA microarray data reveals dynamic changes in cell populations". In: *Proceedings of the National Academy of Sciences* 100.18 (2003), pp. 10370–10375.
- [9] Stephan Preibisch et al. "Efficient Bayesian-based multiview deconvolution". In: *Nature methods* 11.6 (2014), p. 645.

- [10] Shai S Shen-Orr and Renaud Gaujoux. “Computational deconvolution: extracting cell type-specific information from heterogeneous samples”. In: *Current opinion in immunology* 25.5 (2013), pp. 571–578.
- [11] Karim R Lakhani et al. “Prize-based contests can provide solutions to computational biology problems”. In: *Nature biotechnology* 31.2 (2013), p. 108.
- [12] Andrea Blasco et al. “Advancing computational biology and bioinformatics research through open innovation competitions”. In: *PLOS ONE* 14.9 (Sept. 2019), pp. 1–17. DOI: 10.1371/journal.pone.0222165. URL: <https://doi.org/10.1371/journal.pone.0222165>.
- [13] Olaf Ronneberger, Philipp Fischer, and Thomas Brox. “U-net: Convolutional networks for biomedical image segmentation”. In: *International Conference on Medical image computing and computer-assisted intervention*. Springer. 2015, pp. 234–241.
- [14] Laurens van der Maaten and Geoffrey Hinton. “Visualizing data using t-SNE”. In: *Journal of machine learning research* 9.Nov (2008), pp. 2579–2605.
